# Supplementary material for: Whole-Genome Analysis of Candidate genes Associated with Seed Size and Weight in Sorghum bicolor Reveals Signatures of Artificial Selection and Insights into Parallel Domestication in Cereal Crops
Source: Front Plant Sci. 2017 Jul 18;8:1237. doi: 10.3389/fpls.2017.01237 (PMC5513986; doi:10.3389/fpls.2017.01237)
Supplement: Supplementary file 3 [file Table3.XLSX]

## Sheet: Sheet1
Supp. Table 3: list of seed size candidate genes and their expression data
Gene ID	Anther	Leaves	flower1	flower2	Pistil	Embryo	Endosperm	Seed10DAP	Seed5dDAP	Max non-seed	Max seed	Ratio	DHE in seed
Sobic.001G016200	10.2374	41.7364	21.867	28.4743	38.558	18.9267	15.0969	18.9868	28.9661	41.7364	28.9661	0.694025	No
Sobic.001G056700	8.641	13.1456	14.0375	20.4633	17.0845	11.7516	18.926	17.0391	16.5767	20.4633	18.926	0.924875	No
Sobic.001G107100	156.923	116.573	1111.49	1000.82	498.226	166.29	49.1836	120.265	597.033	1111.49	597.033	0.537147	No
Sobic.001G113200	107.755	56.9015	92.2384	63.9412	31.4199	16.8747	12.2259	16.5627	10.3191	107.755	16.8747	0.156602	No
Sobic.001G154900	38.1179	28.4833	24.403	29.1657	26.2084	21.9931	40.7487	25.773	15.3918	38.1179	40.7487	1.06902	No
Sobic.001G170800	1.98607	0	1.52946	5.03982	4.7112	2.14461	0	0.358869	3.72425	5.03982	3.72425	0.738965	No
Sobic.001G172400	20.8817	2.64802	10.2016	10.3595	5.85187	9.62375	36.0804	13.4645	4.22344	20.8817	36.0804	1.72785	No
Sobic.001G254200	10.3297	10.8878	6.91207	7.33365	6.65568	6.32445	8.52966	5.66	5.99646	10.8878	8.52966	0.783414	No
Sobic.001G285000	1.57113	4.83451	1.40183	2.04795	2.22758	2.61917	4.87535	2.60804	1.49384	4.83451	4.87535	1.00845	No
Sobic.001G335800	1.35066	0.444151	1.38125	2.48014	8.70156	4.20152	2.93282	2.14767	3.53641	8.70156	4.20152	0.482847	No
Sobic.001G336200	0	5.00195	0.177314	15.4264	0.667887	62.9025	3.23338	12.8438	0.836253	15.4264	62.9025	4.07759	Yes
Sobic.001G341700	0.0420066	0	2.16953	29.6973	5.89623	2.92481	0.126145	0.246686	1.06678	29.6973	2.92481	0.0984874	No
Sobic.001G382400	26.5721	31.0889	41.3245	85.0698	135.348	43.6401	69.3511	84.9408	76.4904	135.348	84.9408	0.627573	No
Sobic.001G445900	19.6749	12.6904	1.42126	0.519561	3.89115	9.60759	34.9556	8.20299	2.86832	19.6749	34.9556	1.77666	No
Sobic.001G448700	2.24912	17.7983	10.7193	24.2751	20.8056	9.55842	14.1041	9.90604	17.6378	24.2751	17.6378	0.72658	No
Sobic.001G468400	0.89265	0.0569353	11.3973	61.6302	5.08165	2.24795	5.23939	2.19217	1.00848	61.6302	5.23939	0.0850134	No
Sobic.001G482600	8.14315	70.1438	5.85837	12.1325	23.973	2.73077	55.5305	6.67503	42.7325	70.1438	55.5305	0.791667	No
Sobic.001G484200	11.6975	12.7922	18.1429	17.3857	17.1569	26.4241	26.5619	23.5862	23.1777	18.1429	26.5619	1.46404	No
Sobic.001G485400	0.343437	0.749703	2.05122	11.1549	4.36436	3.1712	6.5891	3.80961	5.56688	11.1549	6.5891	0.590691	No
Sobic.001G488400	0.635825	0.869399	1.05688	23.8368	0.27738	1.53794	0	0.402114	0.422862	23.8368	1.53794	0.0645196	No
Sobic.001G488500	29.6593	16.871	22.9924	35.17	39.674	12.1166	26.4038	23.9829	45.4097	39.674	45.4097	1.14457	No
Sobic.002G021200	6.72112	0.197395	5.59009	10.8019	15.4021	19.9962	6.33666	6.31064	12.1593	15.4021	19.9962	1.29828	No
Sobic.002G022600	0.0215042	0	0.336339	2.8281	0.203398	7.06364	0.0322968	0.732983	0	2.8281	7.06364	2.49766	Yes
Sobic.002G054800	0	0.0140127	0	0	0	1.27928	85.7181	43.2594	0.534328	0.0140127	85.7181	6117.17	Yes
Sobic.002G056000	2.50223	2.7478	5.27366	12.7894	11.1639	13.629	18.2638	19.152	13.697	12.7894	19.152	1.49749	No
Sobic.002G116000	7.53753	1106.44	1.78787	10.5499	48.0747	242.419	22.3616	37.1501	192.383	1106.44	242.419	0.219098	No
Sobic.002G216600	0	0.0865424	3.41251	15.4299	11.5571	9.00402	0.277812	1.05034	6.03115	15.4299	9.00402	0.583544	No
Sobic.002G226500	0	0	2.02625	12.5661	3.44022	2.93452	0.16815	0.482282	0.705927	12.5661	2.93452	0.233527	No
Sobic.002G257900	0.317656	0.470515	1.50647	10.1986	8.23194	3.94389	7.31337	1.61673	2.41692	10.1986	7.31337	0.717095	No
Sobic.002G272700	0.222048	89.4889	4.97283	7.77954	1.53477	318.272	33.1321	35.6316	0.0749776	89.4889	318.272	3.55655	Yes
Sobic.002G308400	0.273294	0	0	0	0.0215268	0.443321	19.56	10.4321	0.0984487	0.273294	19.56	71.5713	Yes
Sobic.002G309600	30.8728	29.8775	27.7105	32.7521	26.6148	22.8979	29.3053	32.2854	19.3015	32.7521	32.2854	0.985751	No
Sobic.002G311000	3.41406	7.47101	10.008	20.0733	17.2176	14.5435	1.91421	2.9947	7.72773	20.0733	14.5435	0.72452	No
Sobic.002G312200	0.104852	1.29984	11.7158	77.7374	20.1932	0	0.157435	1.9704	10.567	77.7374	10.567	0.135932	No
Sobic.002G367300	37.6836	0.512837	15.2533	45.6005	49.1106	11.8625	1.87379	2.90529	12.2558	49.1106	12.2558	0.249555	No
Sobic.002G367600	0.0640795	1.76249	1.33383	2.54593	8.90363	30.2003	1824.33	836.99	0.917456	8.90363	1824.33	204.897	Yes
Sobic.002G374400	12.5467	7.08762	23.8925	30.6337	22.3519	15.8717	9.60742	13.5862	15.1541	30.6337	15.8717	0.518112	No
Sobic.003G014500	9.33669	22.784	20.4699	27.8576	19.7138	19.8071	7.77803	14.3703	12.5656	27.8576	19.8071	0.711012	No
Sobic.003G030600	3.55658	5.18239	3.92187	5.41062	23.4431	3.73841	0.742674	1.02356	7.5584	23.4431	7.5584	0.322415	No
Sobic.003G035400	0.0292156	0.0382655	0.692788	2.94059	8.0912	1.2249	0.219336	0.17157	2.96744	8.0912	2.96744	0.366749	No
Sobic.003G140000	6.73363	17.1854	19.9655	17.2119	41.7204	28.3644	8.88836	19.9891	49.6357	41.7204	49.6357	1.18972	No
Sobic.003G230500	15.2308	6.43741	13.1344	10.7245	9.83387	38.1827	451.95	431.046	16.0431	15.2308	451.95	29.6734	Yes
Sobic.003G277900	3.84625	5.44161	18.6602	35.1377	25.0644	22.631	1.58913	3.01669	10.4095	35.1377	22.631	0.644066	No
Sobic.003G292600	1.27702	18.8111	0.679702	0.790708	0.84371	1.44388	1.33047	1.10195	0.816541	18.8111	1.44388	0.0767568	No
Sobic.003G358400	2.78609	2.4343	3.96202	3.74675	9.98724	2.63688	5.7619	4.01319	4.94273	9.98724	5.7619	0.576926	No
Sobic.003G406600	0.458723	0.251623	3.74648	18.6874	16.7524	1.62352	2.09762	4.11429	11.1742	18.6874	11.1742	0.597954	No
Sobic.003G407300	7.44505	21.6537	23.537	34.0798	25.1042	5.83681	14.036	12.5608	11.1946	34.0798	14.036	0.411857	No
Sobic.003G444100	1.96952	0.0320436	1.20329	5.66346	5.16666	2.90634	0.214291	0.368775	3.51603	5.66346	3.51603	0.620827	No
Sobic.004G065400	0	0.15461	0.018933	0.0692077	2.51295	0	0	0	0.155291	2.51295	0.155291	0.0617963	No
Sobic.004G075600	0.194837	0.259002	0.351181	0.602491	0.474946	1.02109	13.2416	10.5506	0.625941	0.602491	13.2416	21.9781	Yes
Sobic.004G085100	0.0707645	0.139035	0.0186458	0.0170396	0	23.0993	1170.48	588.279	5.37186	0.139035	1170.48	8418.6	Yes
Sobic.004G107300	21.5178	8.18253	11.959	19.5722	12.9656	17.0483	8.45482	3.95685	6.69638	21.5178	17.0483	0.792288	No
Sobic.004G133600	0.221686	0.186644	15.4221	4.29179	0.125725	26.8211	392.243	323.852	4.28834	15.4221	392.243	25.4338	Yes
Sobic.004G163700	250.792	0.810483	10.0377	2.49685	7.68467	245.846	408.064	577.95	43.0915	250.792	577.95	2.3045	Yes
Sobic.004G176000	20.5702	13.418	13.0138	15.0279	13.5079	12.1458	12.4795	12.1582	7.89493	20.5702	12.4795	0.606679	No
Sobic.004G214100	54.1421	45.5342	30.268	23.7627	28.5498	16.511	17.6286	33.3093	34.3975	54.1421	34.3975	0.635319	No
Sobic.004G237000	22.1836	0.854113	11.1567	51.059	101.236	1.08962	4.50295	13.3124	43.7764	101.236	43.7764	0.432419	No
Sobic.004G245000	3.54599	4.48702	7.35704	13.2931	14.3178	14.7061	3.29177	3.54267	10.762	14.3178	14.7061	1.02712	No
Sobic.004G247000	204.573	663.593	265.14	315.16	502.672	29.7607	170.433	155.697	207.421	663.593	207.421	0.312573	No
Sobic.004G269900	0.218309	0.513128	1.52424	2.43123	3.54662	16.753	0.860448	2.82047	1.31212	3.54662	16.753	4.72365	Yes
Sobic.004G307800	0.353993	0.882139	16.0596	25.8816	68.7905	0.433681	1.25632	6.53891	24.1678	68.7905	24.1678	0.351325	No
Sobic.004G317300	7.17961	12.4414	14.0162	8.7971	7.43648	22.1241	48.2589	20.5178	7.83782	14.0162	48.2589	3.44308	Yes
Sobic.004G323600	20.8814	12.4449	3.2419	4.80838	8.0699	5.67957	9.23767	9.12431	11.1545	20.8814	11.1545	0.534184	No
Sobic.004G338400	0.0264114	0.0123536	0.723697	2.6965	0.0249645	1.85873	0	0.155103	0.0142689	2.6965	1.85873	0.689312	No
Sobic.005G001500	0	0	0	0	0	2.65484	72.5356	56.3608	0.597223	0	72.5356	NA	Yes
Sobic.005G132000	39.4474	116.208	99.5082	129.136	104.393	146.613	95.8762	121.378	91.1763	129.136	146.613	1.13534	No
Sobic.006G059900	0	0	0	0	0.105156	0.0832912	14.0316	3.07063	0.691371	0.105156	14.0316	133.436	Yes
Sobic.006G080500	0.0260459	0	0	0.0250866	0.0615473	6.162	461.197	348.494	13.9306	0.0615473	461.197	7493.38	Yes
Sobic.006G114600	0	1.14681	1.79225	5.09608	1.92005	1.89219	0.0354657	0.166454	0.216931	5.09608	1.89219	0.371303	No
Sobic.006G203400	0.555663	2.36058	6.09749	5.71403	23.3569	22.8318	12.3186	22.5734	29.7567	23.3569	29.7567	1.274	No
Sobic.006G239000	7.11865	139.732	44.4283	31.824	40.9877	28.3411	232.417	139.416	42.2117	139.732	232.417	1.66331	No
Sobic.006G240700	5.33353	14.2943	10.9999	19.5425	11.9218	3.89386	26.1635	11.3411	7.27985	19.5425	26.1635	1.3388	No
Sobic.007G032400	1.41208	5.64135	9.9103	17.7891	15.4099	26.8623	29.8759	25.7444	23.6158	17.7891	29.8759	1.67945	No
Sobic.007G101500	188.938	371.845	66.3433	51.929	58.8476	29.0834	306.011	518.97	86.3481	371.845	518.97	1.39566	No
Sobic.007G149200	0.0262097	0.0956238	0.621492	2.73902	3.91426	2.45283	0.31483	1.07743	1.74167	3.91426	2.45283	0.62664	No
Sobic.007G166600	30.9702	53.6424	59.5605	54.5758	50.2917	79.8299	60.8222	60.9185	65.4955	59.5605	79.8299	1.34032	No
Sobic.007G193500	6.22046	0.257015	4.6572	33.7264	13.1067	1.82404	0.311333	1.49164	12.7283	33.7264	12.7283	0.377399	No
Sobic.008G001700	0.074137	0	0	0	0.122632	1.99818	140.815	78.8897	0.801133	0.122632	140.815	1148.27	Yes
Sobic.008G100400	1.00044	0.864706	0.875821	1.24613	1.33092	2.96573	1.06763	0.835129	0.890328	1.33092	2.96573	2.22833	Yes
Sobic.008G152800	35.0083	54.3622	27.2449	22.6203	31.9043	18.3814	103.936	66.7609	34.9166	54.3622	103.936	1.91192	No
Sobic.008G173900	21.6915	39.3572	21.1338	24.4283	21.558	23.8211	46.0957	36.2888	16.7012	39.3572	46.0957	1.17121	No
Sobic.008G193300	9.17495	81.6898	26.0562	25.1025	14.0561	17.4033	27.4136	42.0918	12.8084	81.6898	42.0918	0.515264	No
Sobic.009G024600	6.69476	94.6624	0.845109	0.199508	0.126683	12.3335	1.87501	2.52403	0.129154	94.6624	12.3335	0.130289	No
Sobic.009G033600	433.314	915.527	820.687	402.525	246.897	491.17	171.331	227.34	202.558	915.527	491.17	0.536489	No
Sobic.009G036400	2.29621	0.811261	3.52405	13.0766	10.1356	13.6529	3.17997	2.35654	9.89988	13.0766	13.6529	1.04407	No
Sobic.009G040700	12.7864	21.1889	21.6666	28.613	18.5881	17.41	17.2789	19.2028	22.2141	28.613	22.2141	0.776364	No
Sobic.009G049400	79.0778	24.9487	42.4563	55.6256	27.9309	38.6644	32.39	31.9992	30.4406	79.0778	38.6644	0.488941	No
Sobic.009G053600	2.99557	18.4094	16.9868	1.40744	0.690599	0.355554	0.603367	3.08927	2.30897	18.4094	3.08927	0.167809	No
Sobic.009G070000	0.0881768	0.0549914	0.464652	5.98752	1.58357	0.770189	0	0.172608	0.0317595	5.98752	0.770189	0.128632	No
Sobic.010G022600	678.329	0.508793	20.0868	0.41669	3.76208	35.1104	3277.23	1628.69	2.12354	678.329	3277.23	4.83133	Yes
Sobic.010G047400	12.5077	14.9238	14.9275	12.4982	17.5514	15.6346	24.4888	13.3961	17.3889	17.5514	24.4888	1.39526	No
Sobic.010G064600	26.9687	8.45761	12.4429	6.10535	6.17309	5.57983	8.11406	8.09173	8.50948	26.9687	8.50948	0.315532	No
Sobic.010G064800	0	0.0124277	0.01	0.0091399	0.116604	0	0.142483	0.0891631	1.68144	0.116604	1.68144	14.4201	Yes
Sobic.010G069600	8.73351	4.74099	4.65047	5.95246	4.04882	2.23033	4.58411	7.45415	3.04871	8.73351	7.45415	0.853511	No
Sobic.010G072300	176.934	72.9432	769.973	300.597	85.0392	53.8325	198.966	721.866	25.0077	769.973	721.866	0.937521	No
Sobic.010G091700	0.106479	0.333747	1.82394	5.46117	5.53549	0.438452	0.0799386	0.125061	0.230157	5.53549	0.438452	0.0792074	No
Sobic.010G110100	0	0.813433	0.310042	1.79449	2.76513	25.8173	1.37418	2.49536	0.830009	2.76513	25.8173	9.33674	Yes
Sobic.010G111200	1.23317	0.0262181	18.7311	172.116	106.944	33.4467	0.841632	4.54261	80.9976	172.116	80.9976	0.470599	No
Sobic.010G144900	13.3399	5.82293	16.5229	28.1024	18.2304	36.5054	6.0188	8.33562	13.9217	28.1024	36.5054	1.29901	No
Sobic.010G184100	13.6062	55.8624	23.3026	20.8433	28.9979	34.5619	55.1598	35.8041	19.8132	55.8624	55.1598	0.987423	No
Sobic.010G228100	0.115934	0.271139	9.683	18.8014	17.2318	2.9945	3.82962	1.83823	7.18738	18.8014	7.18738	0.382279	No
Sobic.010G273900	20.1478	10.563	12.0304	8.2767	6.93813	5.55237	7.41093	5.82677	8.72428	20.1478	8.72428	0.433014	No
Sobic.010G277300	22.0491	19.2168	93.4163	396.559	155.143	259.153	82.7924	103.103	112.509	396.559	259.153	0.653504	No
Sobic.K041100	98.9012	0.0380426	12.1717	2.04984	5.12515	0	4.39637	5.79529	13.2555	98.9012	13.2555	0.134028	No
Sobic.K041200	0.0566441	0	0	0	0.0133852	0.0848165	40.1014	43.0776	14.1538	0.0566441	43.0776	760.496	Yes
Flower1 indicates pre-emergence flowers, flower2 indicates post-emergence flowers
Max non-seed indicates the maximum expression value in five non-seed tissues (anther, leaves, flower1,flower2 and pistil)
Max seed indicates the maximum expression value in four seed tissues (embryo, endosperm, seed10DAP, seed5DAP)
Ratio was calculated using Max seed divided by Max non-seed
DHE in seed indicates genes have a differently higher level of expression in seed tissue, which is based on ratio>2
