# Supplementary material for: Whole-Genome Analysis of Candidate genes Associated with Seed Size and Weight in Sorghum bicolor Reveals Signatures of Artificial Selection and Insights into Parallel Domestication in Cereal Crops
Source: Front Plant Sci. 2017 Jul 18;8:1237. doi: 10.3389/fpls.2017.01237 (PMC5513986; doi:10.3389/fpls.2017.01237)
Supplement: Supplementary file 4 [file Table4.xlsx]

## Sheet: Sheet1
Supp. Table 4: List of seed size candidate genes and their nucleotide diversity (θπ), Tajima’s D and FST at gene level
gene ID(2.1)	Corresponding gene name	Landraces_pi	Landraces_Tajima's D	Wild&Weedy_pi	Wild&Weedy_Tajima's D	Landraces:Wild&Weedy_FST
Sobic.001G016200	Nuf2 family protein	0.000747203	1.08728	0.0016351	-0.524098	0.18184
Sobic.001G056700	O2	0.000596883	-0.280336	0.00802166	0.683141	0.444564
Sobic.001G107100	SRS5	0.000847784	-0.96217	0.0021784	-0.54587	0.218918
Sobic.001G113200	AHK4	0.000175229	-1.64824	0.00232156	-0.0716914	0.402093
Sobic.001G154900	GL3.1/qGL3	0.000165113	0.338974	0.000518752	-0.257863	0.19567
Sobic.001G170800	Transport protein	0.00428341	1.48429	0.00532299	1.3113	0.0675388
Sobic.001G172400	BRD1	0.00121623	-1.2241	0.0036686	0.178751	0.23274
Sobic.001G184900	Expressed protein	0.00288255	0.626222	0.00477443	0.839283	0.308942
Sobic.001G254100	PGL1	0.000650591	-1.09538	0.000698849	-1.26071	0.041875
Sobic.001G254200	OsFBK12	0.000444523	-1.31456	0.000477712	-1.50932	0.135245
Sobic.001G285000	IKU1	0.000402329	-0.971663	0.000505312	-0.525865	0.0962934
Sobic.001G335800	qGW7/GL7	0.00482188	0.956433	0.00209112	-0.125623	0.455919
Sobic.001G336200	KLU/Grain Length3.2	0.000347058	-0.438155	0.0015718	-0.502847	0.264783
Sobic.001G341700	GS3/zmGS3	0.00190246	0.57221	0.00190363	-0.739631	0.256582
Sobic.001G382400	FER	0.000451489	-0.356562	0.000414063	-0.899305	0.0704141
Sobic.001G445900	CYP90B2/CYP90B1	0.000503741	-0.119409	0.000523007	-0.0860998	0.0630281
Sobic.001G448700	TUD1	0.00240885	1.48621	0.00279476	0.0834678	0.00331095
Sobic.001G468400	Prol1.1	5.54943e-05	-1.18526	0.000182805	-0.432306	0.280572
Sobic.001G482600	TIFY 11b	0.000800136	0.548335	0.00102145	-1.16632	0.333696
Sobic.001G484200	RGA1/D1	0.00186431	-0.721277	0.00314734	0.573008	0.196847
Sobic.001G485400	BG1	0.00106826	0.861131	0.000658395	-0.313609	0.0209402
Sobic.001G488400	PGL1	0.00134251	1.9094	0.000279291	0.630165	0.286169
Sobic.001G488500	OsFBK12	0.000856939	-0.39635	0.000753182	-0.598687	0.148854
Sobic.002G021200	DDM1	0.000632721	-0.111956	0.00262872	-0.120614	0.242472
Sobic.002G022600	ANT	0.00130431	0.476564	0.00155209	-0.0508804	0.104755
Sobic.002G054800	O2	0.000538098	-0.819514	0.00507265	-0.353792	0.282262
Sobic.002G056000	MET1	0.00359855	-0.333863	0.00429136	-0.330653	0.153423
Sobic.002G116000	GbssIIa	0.000366561	-0.556696	0.000721486	0.0294588	0.296648
Sobic.002G216600	DEP1/AGG3	0.00122153	0.11134	0.00157616	-0.972103	0.0882636
Sobic.002G226500	SG1	0.00257671	0.175017	0.00409062	0.0741549	0.0565475
Sobic.002G257900	GW8	0.000775539	-0.154391	0.000971409	-1.11356	0.137262
Sobic.002G272700	EOD3/CYP78A6	0.000436362	-0.265692	0.000343831	-1.43969	0.351913
Sobic.002G308400	MYB transcription factor	0.00263498	-1.63378	0.00684425	0.514282	0.354663
Sobic.002G309600	UPF1	0.000309364	-2.35834	0.00169031	0.842164	0.390394
Sobic.002G311000	Receptor-like kinase	0.00332628	-1.1783	0.00852598	1.30814	0.204257
Sobic.002G312200	GLW7	0.000844194	1.52449	0.00260432	-0.500188	0.147443
Sobic.002G367300	qGW7/GL7	0.000183906	1.42346	0.00185042	1.08913	0.438821
Sobic.002G367600	BG2	0.000229709	-0.383068	0.00200371	0.255419	0.182133
Sobic.002G374400	DEP2	9.56327e-05	-2.05189	0.000479571	-0.0617879	0.530919
Sobic.003G014500	MHZ7	0.000291146	-0.0981965	0.000451564	-0.757403	0.125975
Sobic.003G030600	D2	2.52454e-05	-1.5344	0.00146488	-0.846305	0.292484
Sobic.003G035400	GW5/qSW5	0	NA	0.000268749	-0.531521	0.28471
Sobic.003G140000	OsSAMS1	0.000751491	0.548643	0.00061477	-1.06819	0.283526
Sobic.003G230500	Sh2	0.000248559	-1.02794	0.00382574	0.444818	0.764721
Sobic.003G277900	D61	0.000134656	-0.751372	0.00350056	0.377596	0.344618
Sobic.003G292600	AHP4	0.000456391	-2.48782	0.00173306	-1.78513	0.0512604
Sobic.003G358400	DET2	0.000417267	-1.12735	0.000293618	-0.796864	0.198416
Sobic.003G380900	SERF1	0	NA	0	NA	0
Sobic.003G406600	GW8	0.00184098	-0.31743	0.00283483	0.561509	0.260758
Sobic.003G407300	AHK3	0.000270156	-0.527147	0.000483178	0.393769	0.160681
Sobic.003G444100	OsCCS52B	0.000126039	1.40832	0.00100412	0.539885	0.287415
Sobic.004G065400	GW6	0	NA	0.000292119	-0.995367	0.199292
Sobic.004G075600	Zinc finger protein	0.00126235	-1.47082	0.00164197	-1.73533	-0.0140141
Sobic.004G085100	Bt1	0.00171912	-0.868518	0.00298047	-0.811409	0.577462
Sobic.004G093900	CKX2	0.00409932	0.901044	0.00243219	-1.82466	0.151705
Sobic.004G107300	GW2/zmGW2-4/zmGW2-5	0.000231135	-0.650529	0.000347627	-0.713113	0.223555
Sobic.004G133600	ZmSWEET4c/NA	0.00190078	0.161094	0.00140046	-0.100166	0.224372
Sobic.004G163700	SbeIIb	0.00383074	2.28536	0.00345691	0.0075475	0.0287978
Sobic.004G176000	SDG725	0.00103751	-0.596958	0.00109608	-0.421014	0.0198736
Sobic.004G214100	BC14	0.000636885	-1.49549	0.0026994	-1.34705	0.231167
Sobic.004G237000	PGL2	0.00129753	-1.04818	0.000495047	-1.31162	0.0604679
Sobic.004G245000	AHK4	0.000451023	-1.80217	0.00168411	-0.264327	0.222414
Sobic.004G247000	Gln-4	0.00184632	-1.22803	0.00453471	0.60579	0.395059
Sobic.004G269900	GS2/GL2	0.00248613	-1.25467	0.00529185	-0.0109182	0.0692187
Sobic.004G307800	SGL1	0.00128841	-1.01532	0.00169416	-0.610779	0.633521
Sobic.004G317300	O1	0.00696652	2.55834	0.00699995	0.640365	0.0345644
Sobic.004G323600	SMG1	0.000102337	-1.39242	0.000700665	-0.803924	0.247248
Sobic.004G330200	TGW6	0.000900283	0.27224	0.00205666	0.931152	0.133423
Sobic.004G338400	TH1	0.000239743	-1.37871	0.000335414	0.317221	0.0026609
Sobic.005G001500	PBF1	0.00144324	-0.981607	0.00296668	-0.40016	0.186207
Sobic.005G132000	ARF2	0.0023067	-1.67825	0.00547118	-0.0161464	0.154327
Sobic.006G059900	ZmIPT2	0	NA	0.00165611	0.0751961	0.477959
Sobic.006G080500	RGE1	0.000199512	-2.18253	0.000252303	-1.57649	0.162591
Sobic.006G114600	D11/CYP724B3	0.0006439	-0.679374	0.00114364	-1.08166	0.269242
Sobic.006G203400	GS2/GL2	0.000317885	0.421921	0.000958862	-0.105565	0.333339
Sobic.006G239000	FLO2	0.000406789	-0.719481	0.00110551	-0.28602	0.186047
Sobic.006G240700	AP2	0.000811393	0.621932	0.00120291	-0.635347	0.224216
Sobic.006G268800	NA	0.000102358	-1.5344	0.000649453	-0.769944	0.155738
Sobic.007G032400	OsFIE2/FIE	0.00272267	1.09752	0.00154336	-1.73654	0.0154338
Sobic.007G101500	Bt2	0.000290911	0.62584	0.00210522	0.814685	0.508428
Sobic.007G149200	DEP1/AGG3	2.48044e-05	-1.94665	0.000519105	-0.715775	0.575259
Sobic.007G156800	SGL1	0.000531798	-1.93741	0.00265832	1.00048	0.388437
Sobic.007G166600	NA	0.00397938	-1.04945	0.00775958	0.555766	0.277043
Sobic.007G193500	GW8	0.00146751	0.373435	0.00161838	0.677169	-0.00523807
Sobic.008G001700	PBF1	0.00014251	-2.04443	0.00177808	-0.684529	0.448973
Sobic.008G100400	SMK1	0.000258386	-1.91016	0.00303265	-0.20983	0.419803
Sobic.008G152800	CBL3	0.00502835	1.71901	0.00415013	-1.30163	0.326251
Sobic.008G173900	OsPPKL3	0.00114005	-2.12617	0.00431737	-0.618848	0.178284
Sobic.008G193300	OsSUT2	0.000652569	-2.05309	0.000756723	-1.31198	0.0836883
Sobic.009G024600	RSR1	0.000658301	-0.618327	0.00121881	-0.19798	0.120018
Sobic.009G033600	OsSAMS1	0.00031448	-1.52824	0.00099007	0.412452	0.278779
Sobic.009G036400	APG	0.00213168	2.16388	0.00182226	0.0973783	0.109457
Sobic.009G040700	OsPPKL2	0.00135136	2.67305	0.00610836	0.352283	0.222476
Sobic.009G049400	SRS3	0.00120422	-1.98554	0.0051309	0.690062	0.413654
Sobic.009G053600	GS5	0.00206596	0.403613	0.0024538	0.79912	0.0570959
Sobic.009G070000	GW5/qSW5	0.00106967	-0.257026	0.00164525	0.693224	0.290755
Sobic.009G141500	SERF1	0.00146956	1.42374	0.00145116	0.178181	0.0625738
Sobic.010G022600	Wx1	0.00220781	0.645651	0.00157466	0.0347181	0.0681319
Sobic.010G047400	HGW	0.00304719	-1.74068	0.00565844	-1.01963	0.114168
Sobic.010G064600	DA1	0.000429983	1.23346	0.000485165	-0.691299	0.220555
Sobic.010G064800	CKI1	0.00148483	0.303589	0.00245517	0.0371181	0.248322
Sobic.010G069600	SMG1	0.00180552	-0.66114	0.0047718	0.87984	0.278947
Sobic.010G072300	Sh1	0.000185995	0.779643	0.000380445	-1.57597	0.0899985
Sobic.010G091700	PGL2	0.00122955	-2.07175	0.00361713	1.02497	0.261776
Sobic.010G110100	A transcription factor	0.000691367	0.264382	0.00298481	-0.187833	0.271966
Sobic.010G111200	GASR7	0.00199368	0.522445	0.00289082	-0.265759	0.197784
Sobic.010G144900	NA	0.00267212	1.39109	0.00231479	-1.02022	0.198151
Sobic.010G184100	Bt1	0.00137361	0.11342	0.00163012	-0.727969	0.220786
Sobic.010G210100	GW6	0.000378972	0.271657	0.000591705	1.0012	0.310751
Sobic.010G228100	DEP3	0.000464759	-1.2407	0.00157396	-0.526042	0.220614
Sobic.010G273900	SbeI	0.000408205	-0.297172	0.000501733	-1.04144	0.219995
Sobic.010G277300	BRD2	8.1161e-05	-1.68235	0.00132479	-1.07546	0.562618
Sobic.K041100	GIF1	0.00215186	0.486765	0.00209499	-0.489233	0.176907
Sobic.K041200	Mn1	0.00175507	-0.592416	0.00447904	0.949379	0.430126
